# Supplementary material
Source: publisher site journal article supplement (http://kjim.org/upload/media/kjim-2021-088-suppl9.pdf)
Supplement: Supplementary file 1 [file kjim-2021-088-suppl9.pdf]

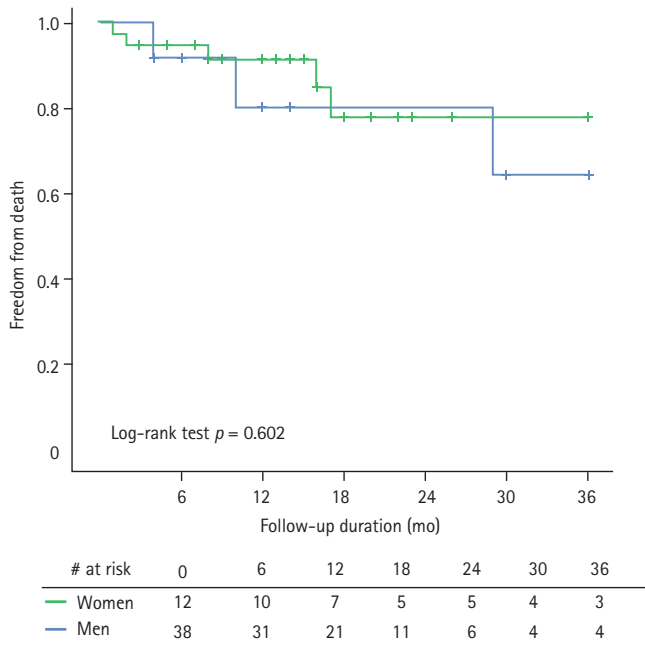

**Supplementary Figure 1.** Three-year survival stratified by sex. Overall survival up to 3 years were similar between men and women.
